# Supplementary material for: Anion-exchange reaction synthesized CoNi2S4 nanowires for superior electrochemical performances
Source: Royal Society of Chemistry journal article supplement (doi:10.1039/c5ra18625k), 2015-01-01
Supplement: c5ra18625k1.pdf [file c5ra18625k1.pdf]

## Supporting Information

### **Anion-exchange Reaction Synthesized CoNi<sub>2</sub>S<sub>4</sub> Nanowires for Superior Electrochemical Performances**

Qingqing Hu<sup>††</sup>, Wenqin Ma<sup>††</sup>, Gan Liang, Honghong Nan, Xiaoting Zheng, Xiaojun Zhang\*

Key Laboratory for Functional Molecular Solids of the Education Ministry of China, College of Chemistry and Materials Science, Center for Nano Science and Technology, Anhui Normal University, Wuhu, 241000, P R China.

Fax: +86-553-3869302; Tel: +86-553-3937135

E-mail: xjzhang@mail.ahnu.edu.cn

#### **Calculation methods:**

The specific capacitance (F g<sup>-1</sup>) and the areal capacitance (F cm<sup>-2</sup>) in the three-electrode Configuration are calculated from the discharge curves according to the following equations:

$$C_s = \frac{I \times \Delta t}{m \times \Delta V} \quad C_a = \frac{I \times \Delta t}{S \times \Delta V} \quad (1)$$

where  $I$ ,  $\Delta t$ ,  $m$ ,  $S$  and  $\Delta V$  are designated as the discharge current density, the total discharge time, the mass of active materials, the geometrical area of the electrode and the discharge potential range, Respectively.

The electrochemical performance of the Ni-Co sulfide NWAs array/nickel foam electrode was also measured using a two-electrode experimental setup. The Ni-Co sulfide NWAs array loaded nickel foam (1×1 cm<sup>2</sup>) directly acted as the electrode. two symmetry electrodes were immersed into a beaker containing 3 M KOH solution with a distance of 15 mm between the centers.

The specific capacitance, energy density ( $E$ ) and power density ( $P$ ) derived from galvanostatic tests can be calculated according to the following equations:

$$C = 4 \times \frac{I \times \Delta t}{m \times \Delta V} \quad (2)$$

$$E = \frac{1}{8} C \Delta V^2 \quad (3)$$

$$P = \frac{E}{\Delta t} \quad (4)$$

**Figure:**

**Figure S1** Typical FESEM images of Ni–Co sulfide nanowire synthesized at different concentration of Na<sub>2</sub>S solution (a) and (b) 0 M; (c) and (d) 0.04 M.

**Figure S2** Typical FESEM images of Ni–Co sulfide nanowire synthesized at reaction temperature (a) and (b) 80°C; (c) and (d) 160 °C.

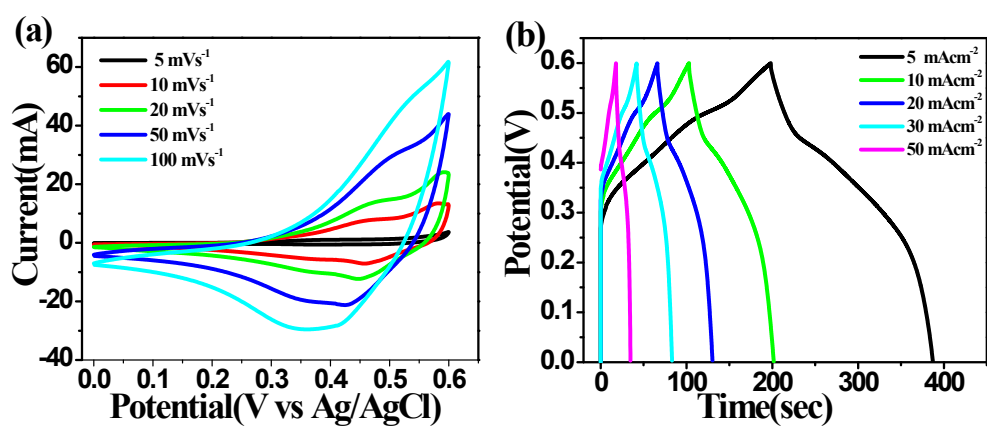

**Figure S3.** The detailed (a) CV curves at various sweep rates and (b) GCD curves at various current densities of Ni-Co oxide nanowire arrays.

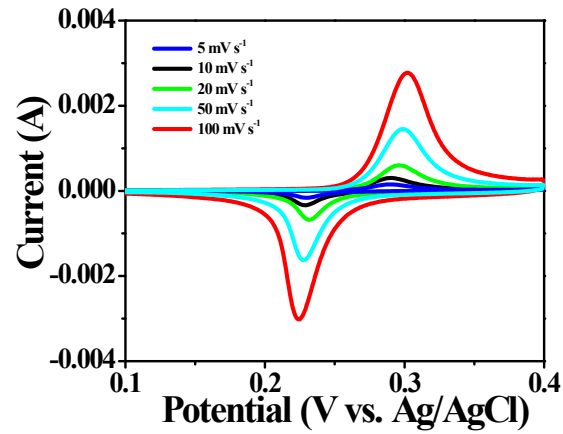

**Figure S4.** CV curves of the bare Ni foam at a sweep rate of 5-100  $\text{mV s}^{-1}$ .

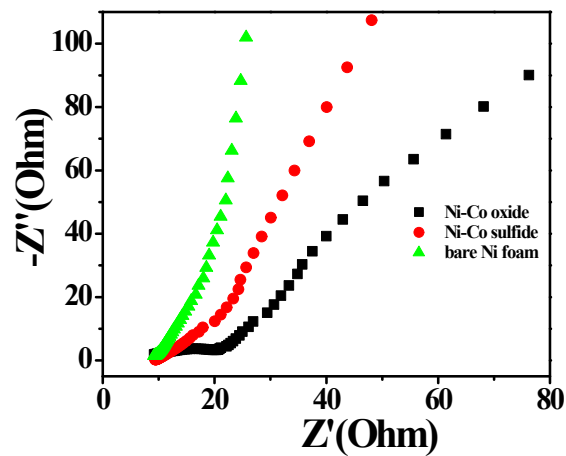

**Figure S5** Impedance Nyquist plots of the Ni-Co oxide and sulfide nanowire arrays grown on Ni foam at open circuit potential.

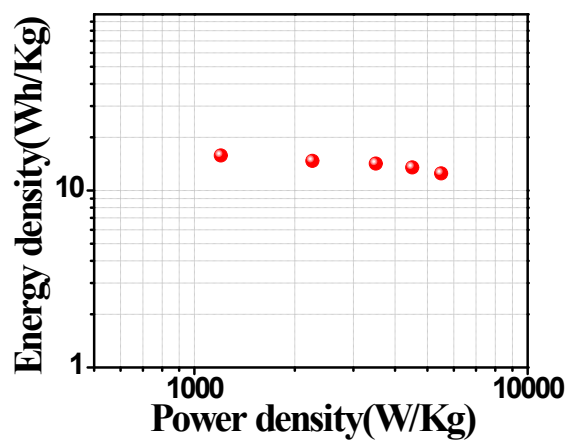

**Figure S6** the Ragone plot showing energy vs. power density.
